# Supplementary material for: Magnetic anisotropy evolution with Fe content in electrodeposited Ni100−xFex thin films
Source: Royal Society of Chemistry journal article supplement (doi:10.1039/d4tc01189a), 2024-01-01
Supplement: d4tc01189a1.pdf [file d4tc01189a1.pdf]

## Supplementary information

### 1) Calculus of microstrain, $\epsilon$ , for each $Ni_{100-x}Fe_x$

From the XRD measurements, we obtain the following data from the (111) diffraction peak:

| x (at. %) | $\theta \times 10^{-2}$ (rads) | FWHM $\times 10^{-2}$ (rads) | $\epsilon \times 10^{-3}$ |
|-----------|--------------------------------|------------------------------|---------------------------|
| 7         | 38,771                         | 0,782                        | 4,788                     |
| 11        | 38,709                         | 0,961                        | 5,891                     |
| 15        | 38,756                         | 0,949                        | 5,809                     |
| 21        | 38,752                         | 1,410                        | 8,634                     |
| 29        | 38,592                         | 1,672                        | 10,288                    |
| 48        | 38,745                         | 2,105                        | 12,893                    |

where  $\theta$  is the center of the (111) peak, FWHM is the full width half maximum, and  $\epsilon$  is the microstrain, which is calculated as:

$$\epsilon = \frac{FWHM}{4 \tan \theta} \quad (1)$$

The plot of  $\epsilon$  vs  $x$  is shown in Supp. Fig. 1, where a linear fit is performed. The line equation obtained is  $\epsilon = 2.05 \times 10^{-4} \cdot x + 3.58 \times 10^{-3}$ . By using this equation, we can estimate the values of  $\epsilon$  for all compositions of the  $Ni_{100-x}Fe_x$  alloys, enabling us to calculate the magnetoelastic anisotropy present in the films.

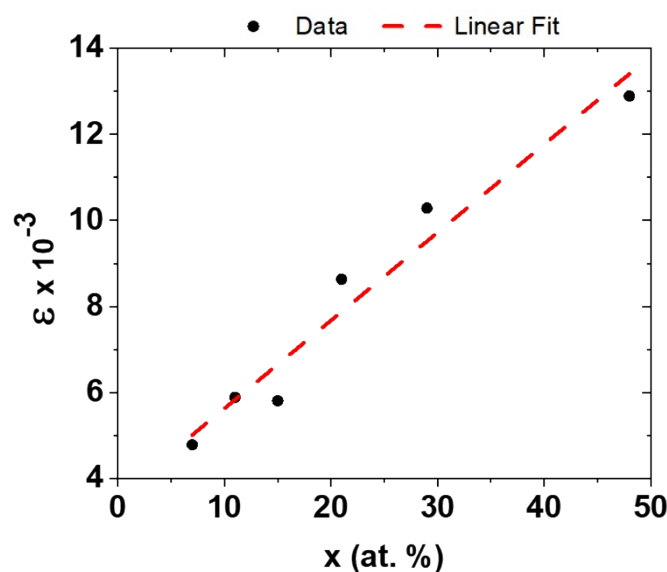

**Supplementary Figure 1.** Microstrain as a function of the Fe at. %. Experimental data in black circles and linear fit in dashed red line.

## 2) Effect of columnar growth on the model

By adding an anisotropy term to account for the columnar growth,  $K_{col}$ , our model yields:

$$K_{tot} = K_{mc} + K_{me} + K_{ms} + K_{pairs} + K_{col}$$

Where the other sources of magnetic anisotropy are defined in the text of the manuscript:

$$K_{mc}: \text{ magnetocrystalline anisotropy; } K_{me} = \frac{3}{2}\lambda_p\epsilon Y; \quad K_{ms} = \frac{1}{2}\mu_0 M_s^2;$$

$$K_{pairs} = -\frac{4K^2 C^4 a^2}{\pi A_0}, \text{ with } K = 3.30 \times 10^6 \text{ J/m}^3.$$

Considering that the contribution of the columnar growth is out-of-plane ( $K_{col} < 0$ ) and can be modeled as a magnetostatic energy, we can define the columnar anisotropy as

$$K_{col} = -\frac{1}{2}NM_s^2 \text{ being } N, \text{ the demagnetization factor induced by the columnar shape.}$$

Assuming the columnar growth as a perfect cylinder  $N = 0.5$ , we obtain that the change of sign in total anisotropy occurs at Fe 19 at. %.

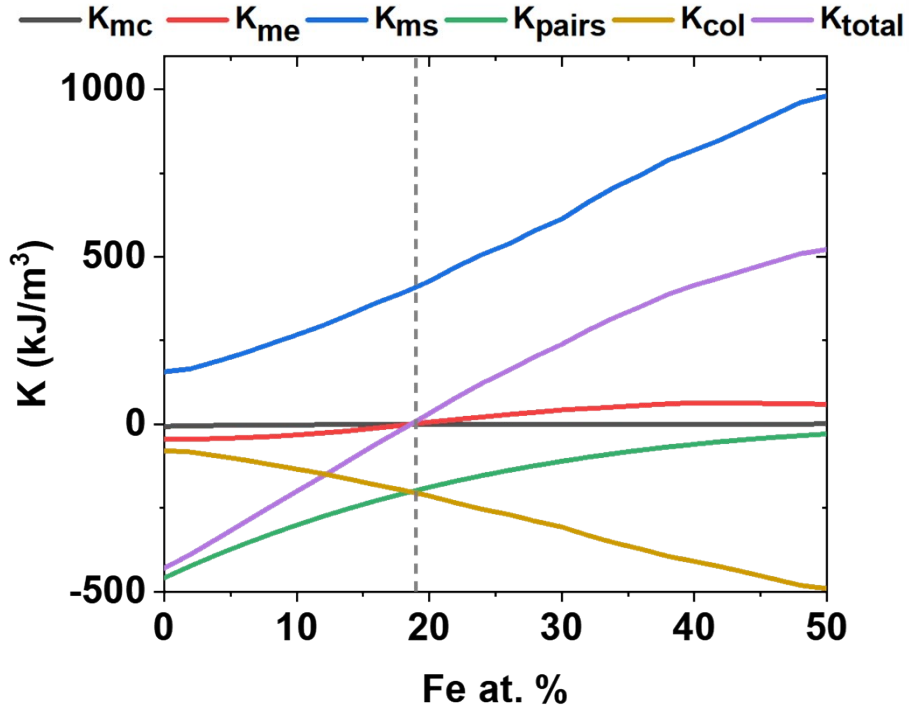

**Supplementary Figure 2.** Dependency of the different magnetic anisotropies with respect to Fe content (at.%). In this figure, columnar growth is considered as a source of OOP anisotropy. The dashed line at Fe 19 at.% indicates the change of sign in  $K_{tot}$ .
